# Supplementary material for: Bioactive Potential: A Pharmacognostic Definition through the Screening of Four Hypericum Species from the Canary Islands
Source: MDPI journal article supplement (doi:10.3390/molecules27186101), 2022-09-18
Supplement: s1 [file s1]

# Bioactive Potential: A Pharmacognostic Definition through the Screening of Four *Hypericum* Species from the Canary Islands

Rodney Lacret <sup>1,2,\*</sup>, Adrián Puerta <sup>1</sup>, Sebastian Granica <sup>3</sup>, Aday González-Bakker <sup>1</sup>,  
Danela Hevia <sup>1</sup>, Yiling Teng <sup>1</sup>, Candelaria C. Sánchez-Mateo <sup>2</sup>, Pedro Luis Pérez de Paz <sup>4</sup>  
and José M. Padrón <sup>1</sup>

<sup>1</sup> BioLab, Instituto Universitario de Bio-Organica Antonio González (IUBO-AG),  
Universidad de La Laguna, Avda. Astrofísico Francisco Sánchez 2,  
38206 La Laguna, Spain

<sup>2</sup> Departamento de Medicina Física y Farmacología, Facultad de Farmacia,  
Universidad de La Laguna, Tenerife, 38200 La Laguna, Spain

<sup>3</sup> Microbiota Lab, Centre of Preclinical Studies, Medical University of Warsaw,  
Banacha 1b, 02-097 Warsaw, Poland

<sup>4</sup> Departamento de Botánica, Ecología y Fisiología Vegetal, Facultad de Farmacia,  
Universidad de La Laguna, Tenerife, 38200 La Laguna, Spain

\* Correspondence: rlacret@ull.es

## Table of Contents

|                                                                                                                                                       |   |
|-------------------------------------------------------------------------------------------------------------------------------------------------------|---|
| <b>Table S1.</b> Antiproliferative activity of <i>Hypericum</i> microextracts .....                                                                   | 2 |
| <b>Table S2.</b> Total activity of <i>Hypericum</i> microextracts .....                                                                               | 2 |
| <b>Figure S1.</b> LC–PDA–MSn chromatograms for <i>Hypericum</i> MW microextracts .....                                                                | 3 |
| <b>Figure S2.</b> Confluency obtained with STEVE software based on refractive indexes<br>resulting from CX-A observation over time.....               | 4 |
| <b>Figure S3.</b> Mean Cell Area obtained with STEVE software based on refractive indexes<br>resulting from CX-A observation over time.....           | 5 |
| <b>Figure S4.</b> Average dry Mass Density obtained with STEVE software based on refractive<br>indexes resulting from CX-A observation over time..... | 6 |

**Table S1.** Antiproliferative activity (GI<sub>50</sub>) against six human solid tumor cell lines of extracts from the aerial parts of *Hypericum* species.

| Microextracts | Cell lines ( <i>origin</i> ) |                              |                           |                           |                            |                          |
|---------------|------------------------------|------------------------------|---------------------------|---------------------------|----------------------------|--------------------------|
|               | A549<br>( <i>lung</i> )      | HBL-100<br>( <i>breast</i> ) | HeLa<br>( <i>cervix</i> ) | SW1573<br>( <i>lung</i> ) | T-47D<br>( <i>breast</i> ) | WiDr<br>( <i>colon</i> ) |
| CMW           | 89                           | 88                           | 67                        | 77                        | 71                         | 113                      |
| CMM           | 51                           | 51                           | 25                        | 32                        | 29                         | 79                       |
| CDM           | 5.8                          | 7.7                          | 5.4                       | 5.6                       | 7.3                        | 8.2                      |
| GMW           | 82                           | 106                          | 37                        | 80                        | 55                         | 96                       |
| GMM           | 5.9                          | 4.0                          | 2.7                       | 3.3                       | 4.1                        | 7.7                      |
| GDM           | 5.4                          | 6.0                          | 6.3                       | 5.3                       | 7.7                        | 13                       |
| LMW           | 81                           | 67                           | 38                        | 59                        | 73                         | 87                       |
| LMM           | 41                           | 43                           | 37                        | 36                        | 55                         | 57                       |
| LDM           | 41                           | 27                           | 11                        | 13                        | 42                         | 34                       |
| RMW           | 140                          | >250                         | 73                        | 126                       | 86                         | 156                      |
| RMM           | 76                           | 74                           | 49                        | 51                        | 59                         | 105                      |
| RDM           | 34                           | 61                           | 20                        | 13                        | 46                         | 101                      |

**Table S2.** Total activity (mL/g) of microextracts from *Hypericum* species against human solid tumor cell lines.

| Microextracts          | Total activity (mL/g)        |                              |                           |                           |                            |                          |
|------------------------|------------------------------|------------------------------|---------------------------|---------------------------|----------------------------|--------------------------|
|                        | Cell lines ( <i>origin</i> ) |                              |                           |                           |                            |                          |
|                        | A549<br>( <i>lung</i> )      | HBL-100<br>( <i>breast</i> ) | HeLa<br>( <i>cervix</i> ) | SW1573<br>( <i>lung</i> ) | T-47D<br>( <i>breast</i> ) | WiDr<br>( <i>colon</i> ) |
| CMW                    | 955                          | 966                          | 1268                      | 1104                      | 1197                       | 752                      |
| CMM                    | 1863                         | 1863                         | 3800                      | 2969                      | 3276                       | 1203                     |
| CDM                    | 4130                         | 3117                         | 4449                      | 4286                      | 3287                       | 2927                     |
| <i>H. canariense</i>   | <b>6948</b>                  | <b>5946</b>                  | <b>9517</b>               | <b>8359</b>               | <b>7760</b>                | <b>4882</b>              |
| GMW                    | 915                          | 708                          | 2027                      | 937                       | 1364                       | 781                      |
| GMM                    | 13556                        | 20000                        | 29630                     | 24242                     | 19512                      | 10390                    |
| GDM                    | 3519                         | 3166                         | 3016                      | 3585                      | 2468                       | 1462                     |
| <i>H. grandifolium</i> | <b>17990</b>                 | <b>23874</b>                 | <b>34673</b>              | <b>28764</b>              | <b>23344</b>               | <b>12633</b>             |
| LMW                    | 1716                         | 2075                         | 3658                      | 2356                      | 1900                       | 1562                     |
| LMM                    | 1854                         | 1767                         | 2054                      | 2111                      | 1382                       | 1333                     |
| LDM                    | 2220                         | 3370                         | 8272                      | 7000                      | 2166                       | 2676                     |
| <i>H. glandulosum</i>  | <b>5790</b>                  | <b>7212</b>                  | <b>13984</b>              | <b>11467</b>              | <b>5448</b>                | <b>5571</b>              |
| RMW                    | 1021                         | 572                          | 1917                      | 1135                      | 1662                       | 916                      |
| RMM                    | 908                          | 932                          | 1408                      | 1352                      | 1169                       | 657                      |
| RDM                    | 353                          | 1967                         | 600                       | 923                       | 260                        | 118                      |
| <i>H. reflexum</i>     | <b>2282</b>                  | <b>3471</b>                  | <b>3925</b>               | <b>3410</b>               | <b>3091</b>                | <b>1691</b>              |

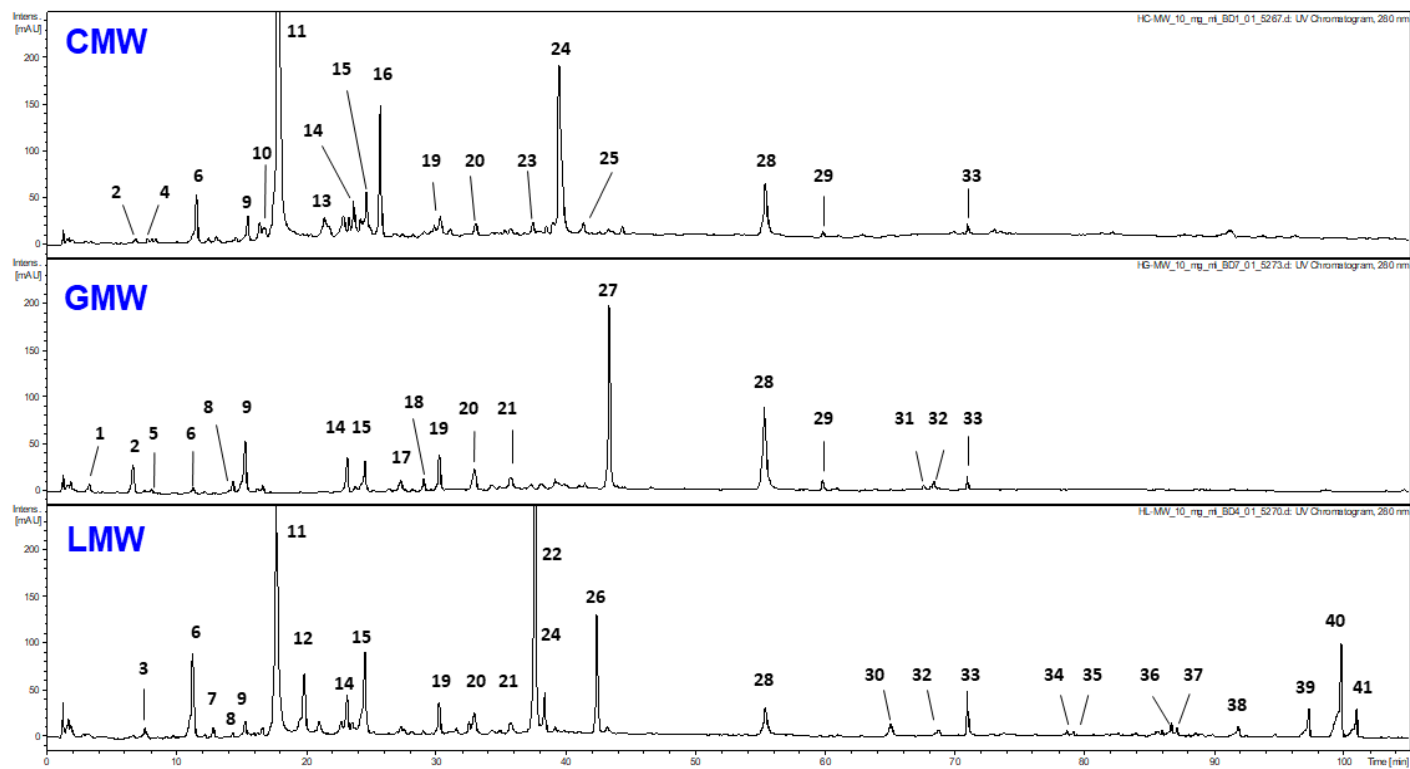

**Figure S1.** LC-PDA-MSn chromatograms (280 nm) for *Hypericum* MW microextracts.

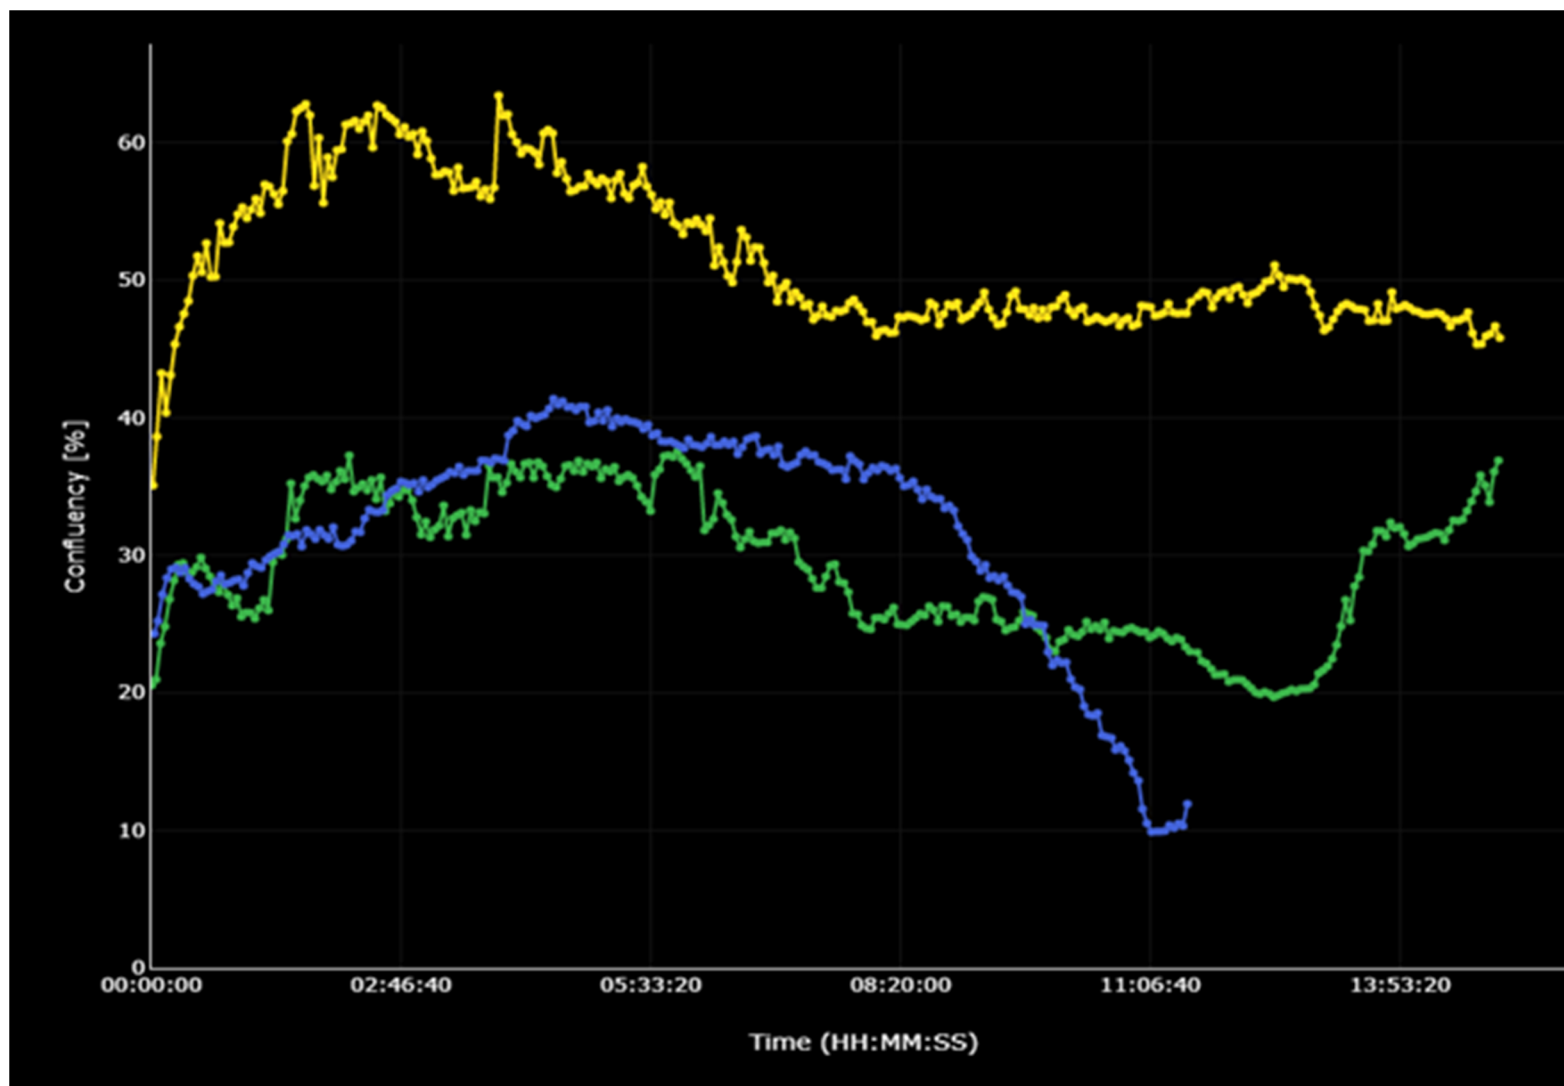

**Figure S2.** Confluency obtained with STEVE software based on refractive indexes resulting from CX-A observation over time. Green: untreated cells. Yellow: TAM (10  $\mu$ M). Blue: GMW (100  $\mu$ g/mL)

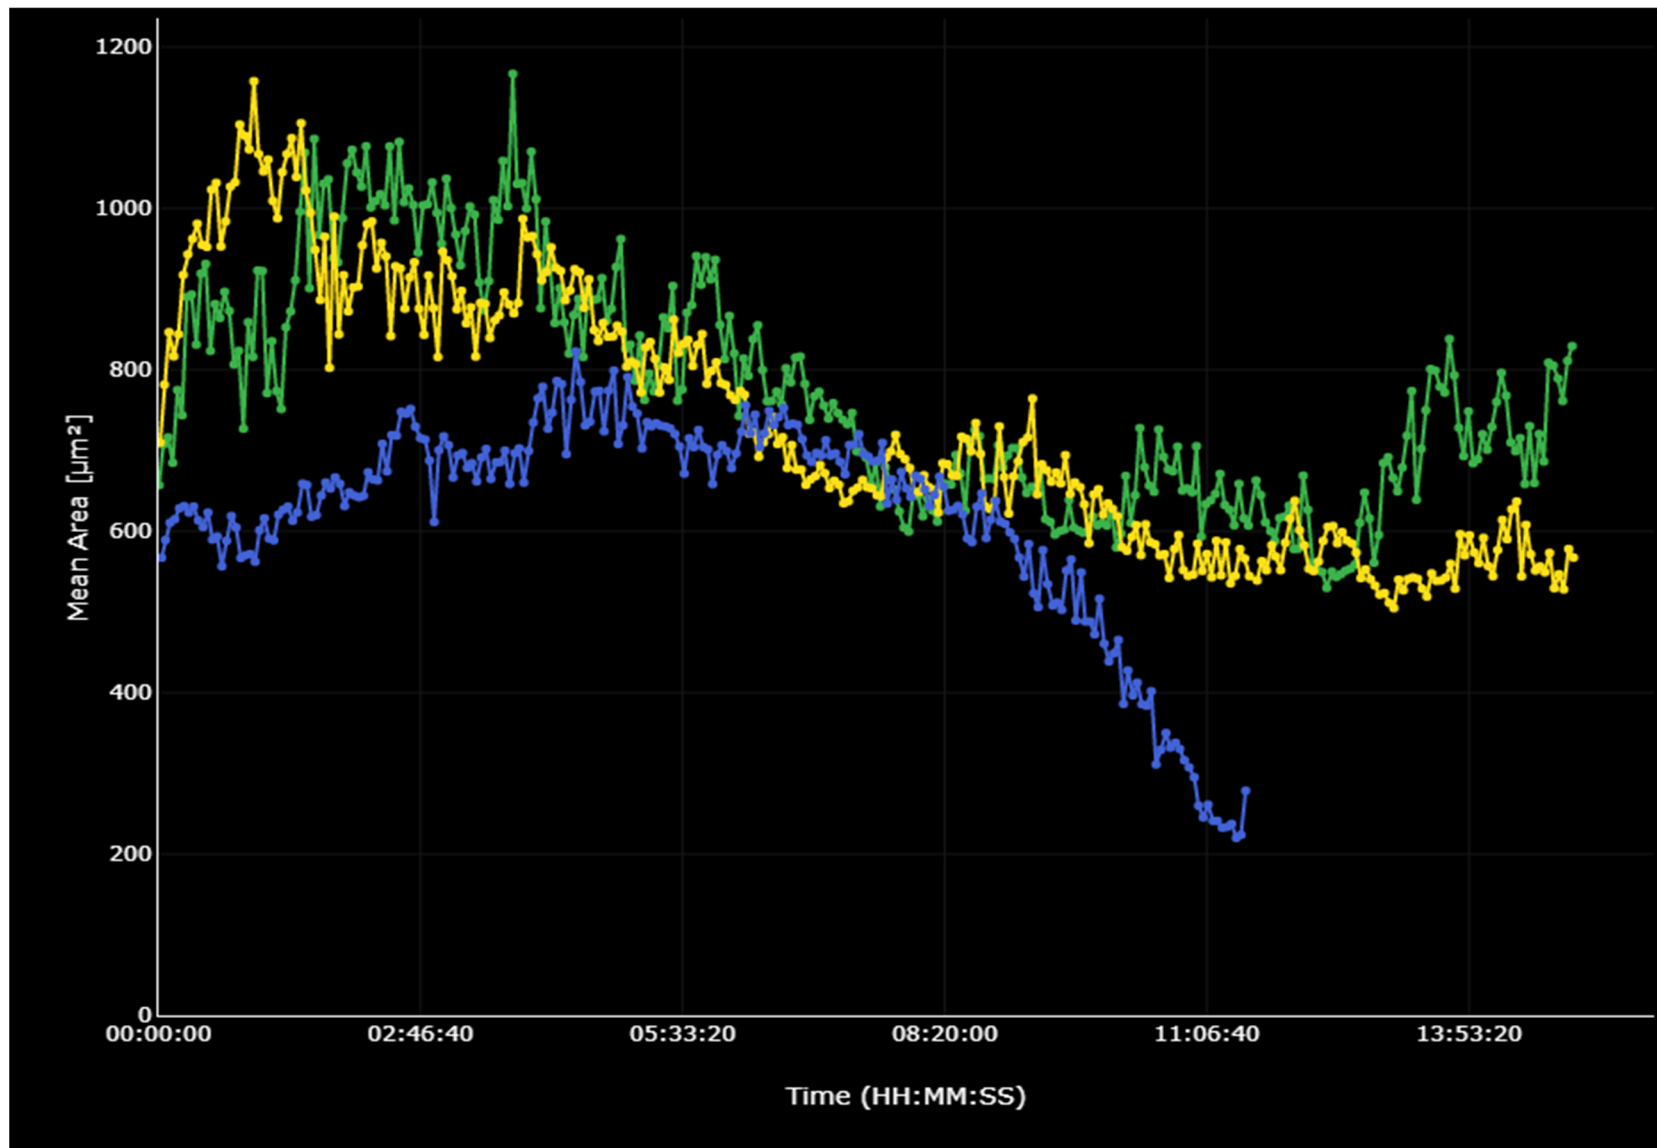

**Figure S3.** Mean Cell Area obtained with STEVE software based on refractive indexes resulting from CX-A observation over time Green: untreated cells. Yellow: TAM (10 μM). Blue: GMW (100 μg/mL)

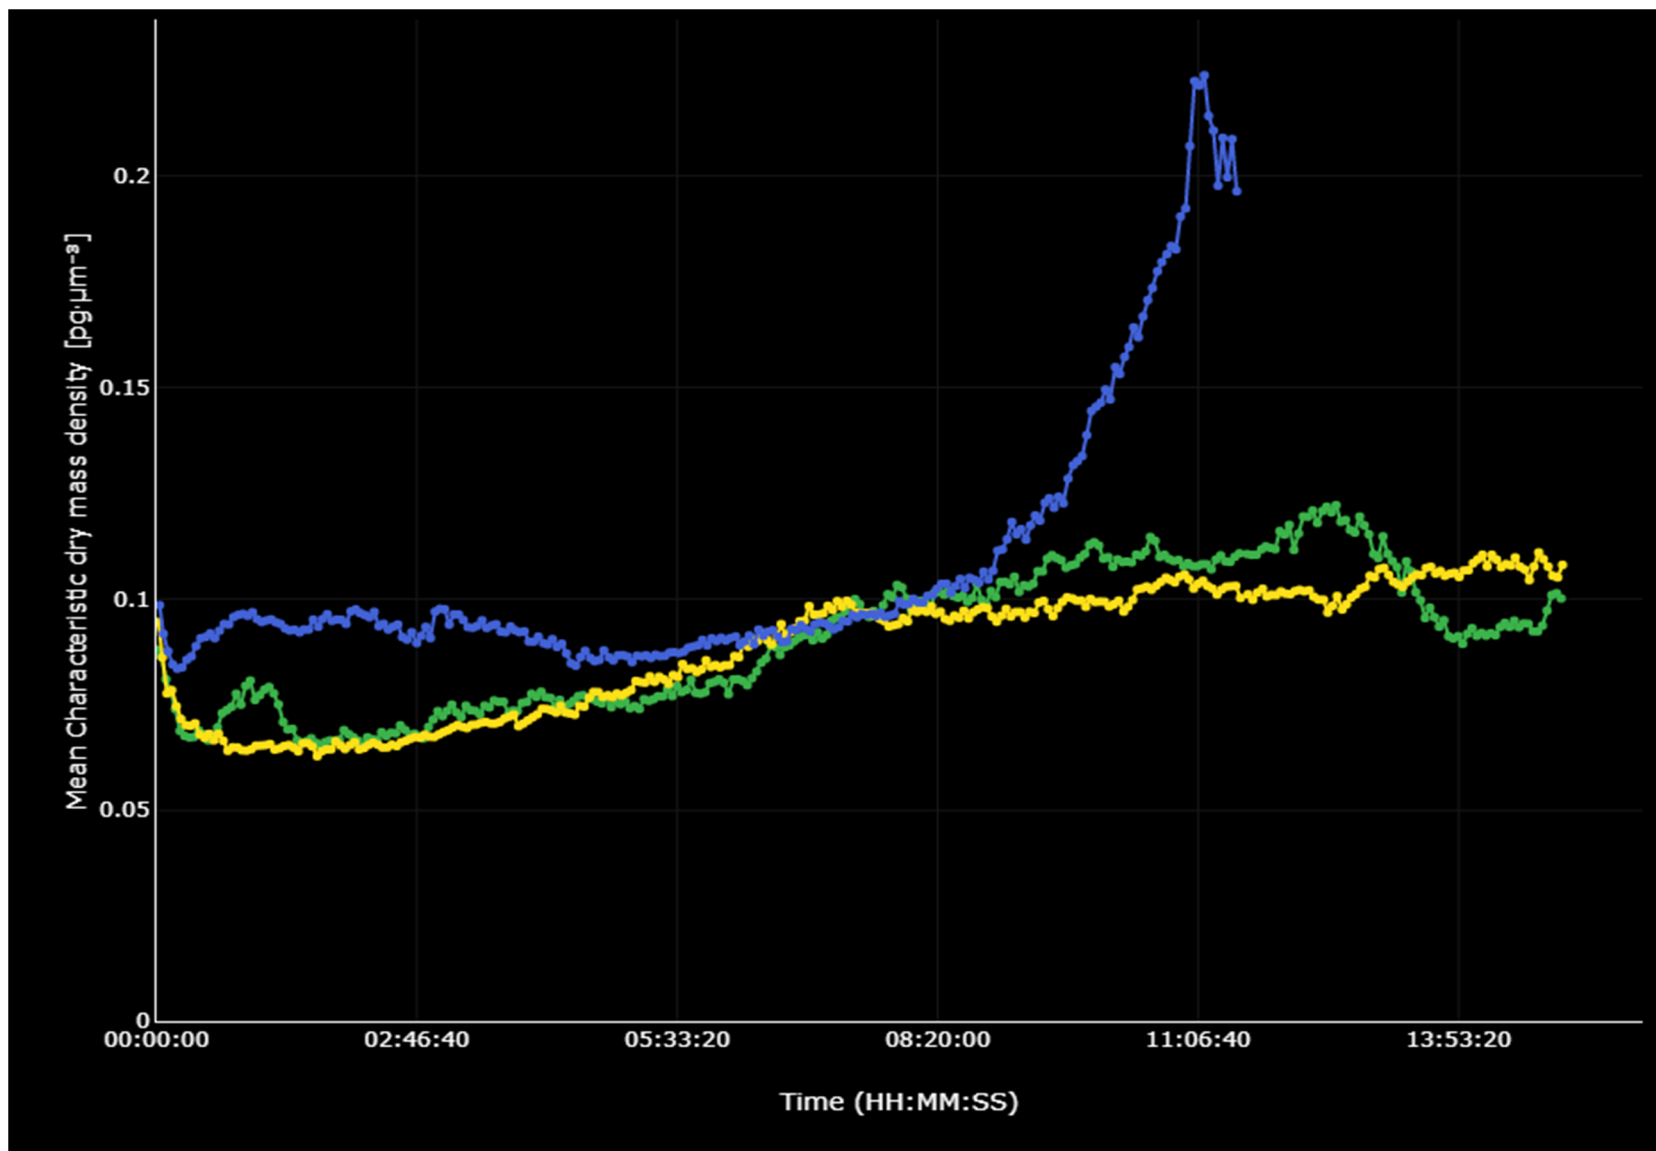

**Figure S4.** Average dry Mass Density obtained with STEVE software based on refractive indexes resulting from CX-A observation over time. Green: untreated cells. Yellow: TAM (10  $\mu\text{M}$ ). Blue: GMW (100  $\mu\text{g/mL}$ ).
